# Supplementary material for: Intradermal administration of green synthesized nanosilver (NS) through film-coated PEGDA microneedles for potential antibacterial applications
Source: Royal Society of Chemistry journal article supplement (doi:10.1039/d0bm02136a), 2021-01-01
Supplement: d0bm02136a1.pdf [file d0bm02136a1.pdf]

## Supporting Information

### **Intradermal administration of green synthesized nanosilvers (NSs) through film-coated PEGDA microneedles for potential antibacterial applications**

Ya Gao<sup>1, #</sup>, Wei Zhang<sup>2, #</sup>, Yan Fang Cheng<sup>1</sup>, Yang Cao<sup>2</sup>, Zhigang Xu<sup>1</sup>, Li Qun Xu<sup>1</sup>, Yuejun Kang<sup>1, \*</sup> and Peng Xue<sup>1, \*</sup>

- 1 School of Materials and Energy, Southwest University, Chongqing 400715, China.
- 2 Chongqing Key Laboratory of Ultrasound Molecular Imaging, Institute of Ultrasound Imaging, Second Affiliated Hospital, Chongqing Medical University, Chongqing, 400010, China

#Y. Gao and W. Zhang contributed equally to this work.

Corresponding authors: P. Xue ([xuepeng@swu.edu.cn](mailto:xuepeng@swu.edu.cn)), Y. Kang ([yjkang@swu.edu.cn](mailto:yjkang@swu.edu.cn))

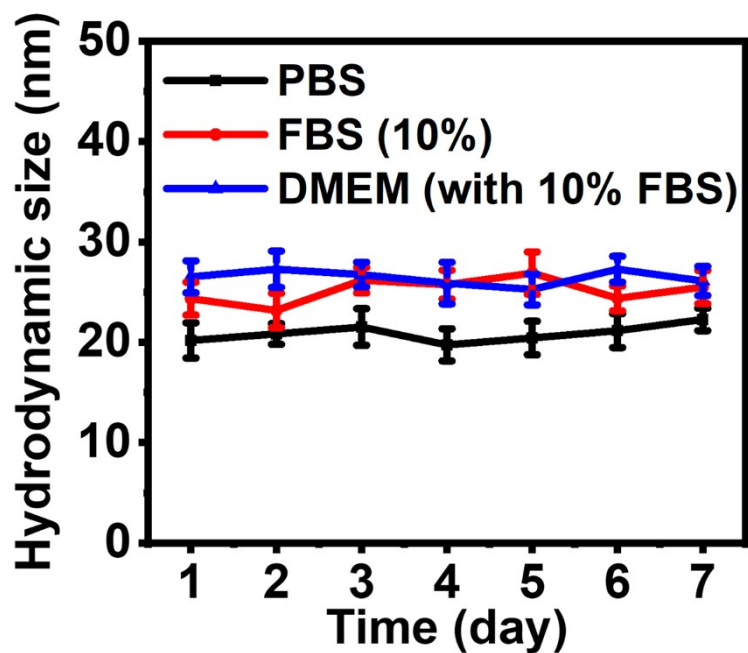

**Fig. S1** Long-term stability of green synthesized NSs under physiological conditions, evaluated by monitoring the hydrodynamic size in PBS, FBS (10%) and DMEM (with 10% FBS) for seven days.

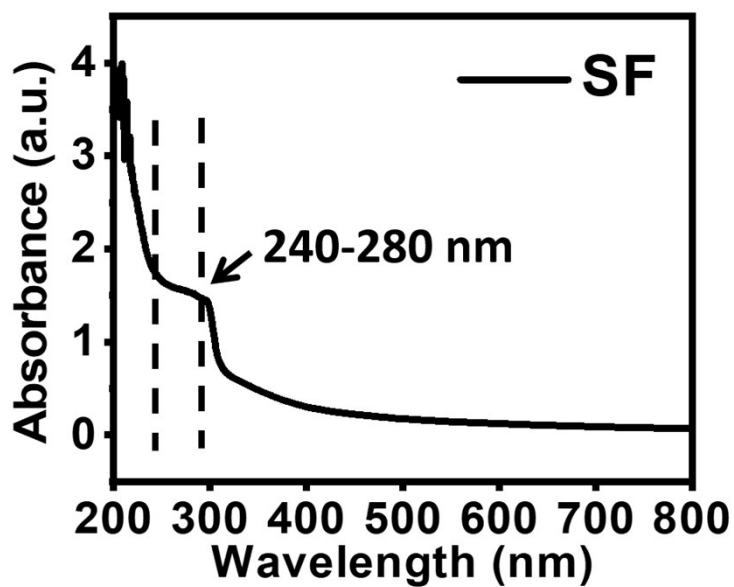

**Fig. S2** UV-vis-NIR absorption spectrum of SF dispersion.

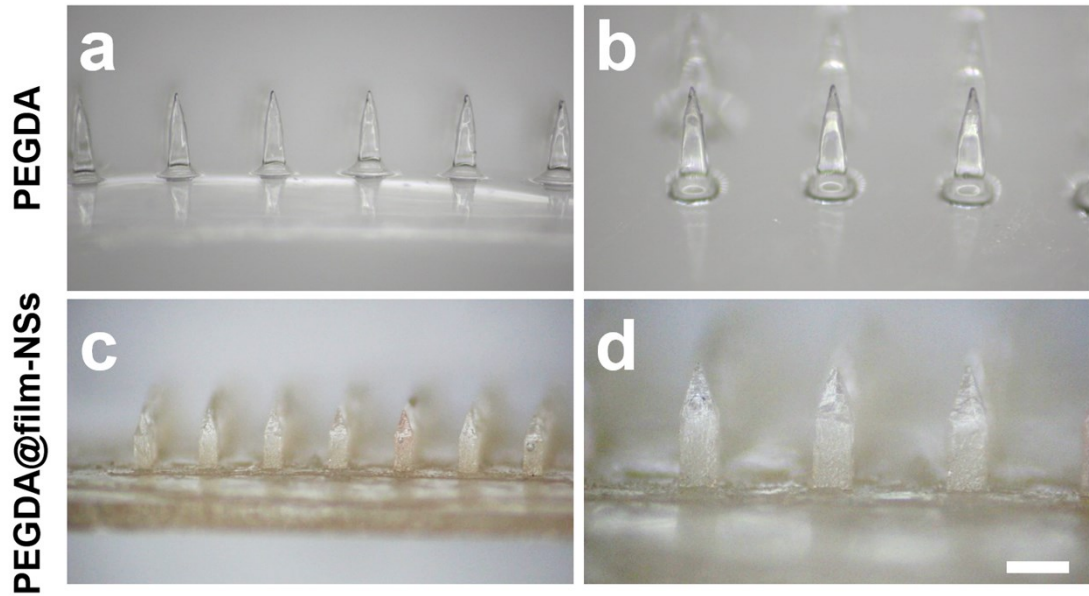

Fig. S3 Stereoscopic microscopy of (a-b) PEGDA microneedles and (c-d) PEGDA@film-NSs microneedles (scale bar: 500  $\mu\text{m}$ ).

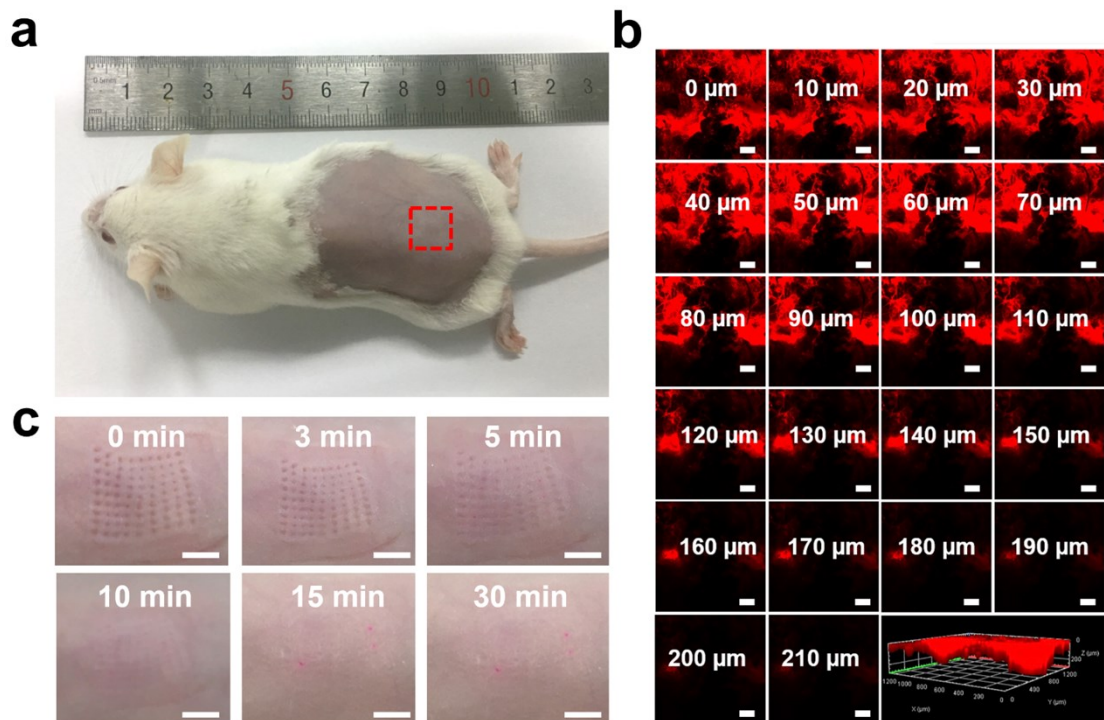

**Fig. S4** Mouse skin after being applied with PEGDA@film-RhB microneedles. (a) Photograph of Kumming (KM) mouse with back hair shaved (red rectangular enclosed area representing the microneedle administration site); (b) layer-by-layer scanning and reconstructed 3D images of an excised mouse skin after applying PEGDA@film-RhB microneedles for 2 min (scale bar: 200  $\mu\text{m}$ ); (c) skin recovery over time upon the removal of microneedle patch (scale bar: 2 mm).
